1     **Social interaction influences innate color preference**  
2                                   **of zebrafish shoals**

3                    Ju Wang <sup>a</sup>, Lifen Yin <sup>a</sup>, Bin Hu <sup>b</sup>, Lei Zheng <sup>a,\*</sup>

4    a School of Food and Biological Engineering, Hefei University of  
5    Technology, Hefei, 230009, China

6    b School of Life Science, University of Science and Technology of China,  
7    Hefei, 230027, China

8

9 **Abstract**

10 The color discrimination can confer survival advantages by helping  
11 animals to find nutritious food and shelter and to avoid predator.  
12 Zebrafish as a social species, data on innate color preference in shoals  
13 remain controversial and there are limited data for this organism. Here we  
14 showed that, when given a choice among two color combinations (R-Y,  
15 R-G, Y-G, B-G, B-R, B-Y), shoals of zebrafish exhibited a complex  
16 pattern of color preference and the order of RYGB preference was  
17  $R > Y > G$ ,  $B > G$ . By contrast, the individual zebrafish showed marked  
18 changes, completely losing their preference for all the tested color  
19 combinations. To investigate the role of shoaling behavior in color  
20 preference, we selected a D1-receptor antagonist (SCH23390), which  
21 could disrupt social preference and decrease social interaction in  
22 zebrafish. Interestingly, the shoals that were treated by SCH23390  
23 showed no color preference for all color combinations. Our findings  
24 indicate that social interaction is involved in color-driven behavior in  
25 zebrafish, and reveal the possible mechanisms that the dopaminergic  
26 system may contribute to innate color preference in shoals of zebrafish.

27 **Keywords:** Innate color preference; Social preference; Zebrafish.

28

## 29 **1. Introduction**

30 Color preference has been studied in a wide range of species- insects  
31 [1-3], birds [4], fish [5-7], and humans [8]- affecting foraging, decision  
32 making, and reproduction. Humans are commonly the most like blue and  
33 dislike yellowy-green when individuals vary in their color preference [8].  
34 Animals are often better able to perceive colors in their environment  
35 [9-11], and their color preference are either most represented in the  
36 environment [12] or contrast with the background [13]. For example, the  
37 parasitic wasp (*Venturia canescens*) prefers yellow, which is the most  
38 common color among natural flowers in their living regions [1].  
39 Bumblebees (*Bombus impatiens*) prefer blue flowers, which stand out in a  
40 complex background [2]. The fruit fly *Drosophila* prefers green light to  
41 red light in the early morning and late afternoon, when the flies showed  
42 the higher activity, because such timed preference and the burst of  
43 activity are devoted to searching for food in or under green trees and  
44 bushes [3,14]. While tropical Asian birds prefer red and black, which are  
45 the most commonly encountered forest fruit colors [4].

46 Plenty of researches have proven that zebrafish (*Danio rerio*) have  
47 preference towards different colors [5-7, 15-17]. Surprising, the color  
48 preference of zebrafish has been extensively studied but still remains  
49 controversial. For instance, some researches show a strong preference for  
50 blue [5,15], whereas others report a clear aversion for this color

51 [6,7,16,17]. It is still not clear whether the shoaling behavior affect the  
52 color preference. As is well known, zebrafish are social animals and tend  
53 to travel in shoals [18]. Meanwhile, there is a vital necessity for fish to  
54 sense danger and stay away from predators, thus it is beneficial for a fish  
55 to stay tight within a shoal and to assess the social interaction efficiently.  
56 We make a hypothesis that the characteristic of background color may  
57 influence the efficiency of social contact within a shoal and consequently  
58 shoal may prefer certain background colors in order to keep the social  
59 contact, which can be called as innate color preference of shoals.  
60 Recently, Park *et al.* used zebrafish larvae (5 days post fertilization (dpf))  
61 to test the innate color preference in shoals [19]. However, shoaling  
62 behavior usually starts to develop after 7 dpf, becoming progressively  
63 stronger for the mature [20-22]. As far as we know, no research has been  
64 published that investigate the innate color preference of mature shoals,  
65 although shoaling and social behavior in general has received  
66 considerable critical attentions.

67 The cohesion of shoals has been found to be associated with the  
68 whole brain dopamine level [23]. Dopamine is one of the major  
69 neurotransmitters in the central nervous system of the vertebrate brain  
70 which plays important roles in a variety of cerebral functions, such as  
71 mood, attention, reward and memory [24-26]. Abundant evidence shows  
72 that dopamine is associated with the neurobehavioral functions in

73 zebrafish [27,28]. Saif *et al.* [27] found that strong social stimuli will  
74 increase the dopamine and its metabolite 3,4-dihydroxyphenylacetic acid  
75 (DOPAC) levels in the brain of the adult zebrafish. The short-term  
76 isolated zebrafish could reduce the level of DOPAC [28]. The social  
77 interaction of shoals in zebrafish can be affected by the dopaminergic  
78 system through influence of the dopamine level [29]. D1 dopamine  
79 receptor antagonist (SCH23390) is most abundantly expressed dopamine  
80 receptor subtypes in the brain of zebrafish [30]. And SCH23390 disrupts  
81 social preference of zebrafish by decreasing the level of dopamine in  
82 dopaminergic system [31,32].

83 In the present study, we used two-color combinations (R-Y, R-G,  
84 Y-G, B-G, B-R, B-Y) to test the innate color preference of shoal (10 adult  
85 zebrafish) and individual fish, respectively. Moreover, we evaluated the  
86 influence of social interaction on the color preference of shoal, by  
87 implementing D1-receptor antagonist to disrupt social preference of  
88 zebrafish.

## 89 **2. Materials and Methods**

### 90 *2.1. Animals*

91 Adult zebrafish of the wild type (AB strain) were obtained from  
92 breeding center at University of Science and Technology of China.  
93 Zebrafish were maintained in an environmental controlled room with a 14  
94 h light/10 h dark cycle (room fluorescent light, 08:00 am-22:00 pm) and a

95 temperature at 28°C. The pH and conductivity in circulating water of the  
96 aquarium were 7.0-7.4 and 1500-1600 µs/cm, respectively. Animals were  
97 fed twice per day, at 09:00 am and 14:00 pm, with frozen brine shrimps.

## 98 2.2. *SCH23390 exposure*

99 1.0 mg/L D1-receptor antagonist SCH23390  
100 (R-(+)-8-chloro-2,3,4,5-tetrahydro-3-methyl-5-phenyl-1H-3-benzazepine-  
101 1-ol; Cat # D054; Sigma-Aldrich) were applied to treat individuals. 1.0  
102 mg/L SCH23390 which significantly reduced the amount of dopamine in  
103 the brain of zebrafish [29], so we selected this concentration to conduct  
104 our experiments. Before color preference test, fish were placed in drug  
105 exposure beaker (500 mL in volume) and remained in D1-receptor  
106 antagonist solution for 30 min. Because the 30-min exposure period is  
107 sufficiently long for the drug to reach the zebrafish brain through the  
108 vasculature of their gills and skin [29]. All the animals in the beaker were  
109 offered the same conditions (including illumination, temperature and  
110 dissolved oxygen) which were identical to the standard aquarium.

## 111 2.3. *Experimental apparatus*

112 The color-enriched conditional place preference (CPP) apparatus, is  
113 a commercial fish tank (35 cm length × 20 cm width × 23 cm height),  
114 colored with four color combinations (red (R), green (G), yellow (Y) and  
115 blue (B)). To create the preference for two colors, the CPP tank was

116 divided into two compartments which were covered with the  
117 corresponding colors on all side except the top. A video camera  
118 (NVH-589MW; Wang Shi Wu You Corporation; China) was placed above  
119 the CPP tank for vertical video tracking. The color preference apparatus  
120 was placed over the LED light panel to ensure the light source could  
121 cover the whole tank. The detailed apparatus has been described in our  
122 previous work [33]. The experimental tanks were poured into 10 L fresh  
123 fish water, there was no physical barrier between the two compartments  
124 and the experimental subjects could swim freely in the entire tank. The  
125 outside of color-enriched CPP tank was opaque to prevent external visual  
126 interference from all direction. To minimize the effect of noise, the  
127 experimental room was closed and kept quiet, and the experimenter was  
128 not visible to the fish during the recording.

#### 129 *2.4. Color preference test*

130 To test the color preference of shoals in zebrafish, the color-enriched  
131 CPP tank is for to measurement of color preference in adults. Each two of  
132 the four colors were combined as a group to color the CPP tank (six  
133 groups in total). The 10-adult zebrafish with equal numbers of males and  
134 females (a shoal) swam freely in the color preference apparatus. After  
135 5-min adaption, the proportion of numbers stayed in each colored zone  
136 was recorded every 1 min for 30-min experiment. Unlike the color  
137 preference of shoals, the individual fish was recorded the proportion of

138 time spent in each colored zone during 30-min experiment. The  
139 behavioral analyses were performed with the SMART 3.0 software  
140 (SMARTSUPER, Panlab, Spain).

### 141 2.5. *Statistical analysis*

142 All experimental results were expressed as the means  $\pm$  standard  
143 error of the mean (SEM) and analyzed by an independent t-test using the  
144 SPSS statistics program. Significance was set at  $p < 0.05$  for all the  
145 experiments.

## 146 3. Results

### 147 3.1. *The innate color preference of shoals in zebrafish*

148 To investigate color preference in shoals of zebrafish, a shoal was  
149 introduced and allowed to swim freely in color-enriched CPP tank. After  
150 5-min acclimation to the treatments, the location of each zebrafish in each  
151 colored zone was counted every 1 min for 30 min total of video recording.  
152 As demonstrated in Fig. 1A-1C, R (80.0%  $\pm$  16.56%) was preferred over  
153 Y (20.0%  $\pm$  16.56%) ( $t_9 = 5.73$ ,  $p < 0.001$ ), and R (77.10%  $\pm$  21.92%) was  
154 preferred over G (22.90%  $\pm$  21.92%) ( $t_9 = 3.91$ ,  $p < 0.01$ ), and Y (67.27%  
155  $\pm$  16.52%) was preferred over G (32.73%  $\pm$  16.52%) ( $t_9 = 3.31$ ,  $p < 0.01$ ),  
156 suggesting the order of color preference was R>Y>G. Between B and G  
157 colors, the adults showed a greater preference for B (79.01%  $\pm$  12.65%)  
158 over G (20.99%  $\pm$  12.65%) ( $t_9 = 7.25$ ,  $p < 0.001$ ) (Figure 1D). However,  
159 no distinct preference was observed between R, Y and B (Fig. S1, Table



160 S1). Thus, the order of RYGB preference was  $R > Y > G$ ,  $B > G$ .

### 161 3.2. *The innate color preference of a single zebrafish*

162 We next set out to identify the social isolation that affected color  
163 preference in zebrafish. First, we focused on the color discrimination of  
164 an individual fish. To test the role of social contact in zebrafish, we  
165 measured color preference in an individual fish which was separated from  
166 a shoal. Individual fish could swim freely in the same CPP tank. After  
167 5-min adaptation to the environment, the percentage of time spent in  
168 different zones was recorded during a period of 30 min. Unexpectedly,  
169 from Fig. 2 and Fig. S2, the zebrafish showed marked changes,  
170 completely losing their preference for all colors (R-Y, R-G, Y-G, B-G,  
171 B-R, B-Y) (Table S1). These data raised the possibility that social  
172 interaction in shoals of zebrafish played an important role in color  
173 preference.

### 174 3.3. *The innate color preference of shoals depends on the social* 175 *interaction*

176 To start the color preference in shoals, a group of 10 fish with equal  
177 numbers of males and females remained in the D1-receptor antagonist  
178 solution for 30 min. Then, the shoals of zebrafish could swim freely in  
179 color-enriched CPP tank. After 5-min acclimation, the location of each  
180 zebrafish in each colored zone was counted every 1 min for 30 min total  
181 of video recording. From the results in Fig. 3 and Table S1, by contrast

182 with the shoals without SCH23390 treatment, the shoals lost their interest  
183 in color combinations in color-enriched CPP tank (R-Y, R-G, Y-G, B-G).  
184 These results suggest that the color preference of shoals require the  
185 participation of social interaction.

#### 186 **4. Discussion**

187 The shoaling behavior is one of the most robust and consistent  
188 behavioral features in zebrafish, which has been observed both in nature  
189 [34] and in the laboratory [35]. Fish often forms aggregations and is  
190 found mostly in lakes, puddles, ponds, rice fields, ditches and small  
191 watercourses [36]. The intricate living conditions which contain abundant  
192 colors and shoaling behavior may affect foraging, predator avoidance and  
193 reproductive success. The results show a clear innate color preference in  
194 shoals of zebrafish. The innate color preference would spur shoal on to  
195 emigrate to the environment with a favorable color background that  
196 benefits social contact. According to this studies, the order of RYGB  
197 preference was  $R > Y > G$ ,  $B > G$ . Some results of color preference were  
198 consistent with the findings which were reported by Park *et al.* [19] and  
199 Peeters *et al.* [37]. They used zebrafish larvae (5 dpf) to test the innate  
200 color preference in shoals, and found that zebrafish preferred R over Y,  
201 and R over G, and B over G. However, literature has emerged that offers  
202 contradictory findings about the innate color preference in shoals. A  
203 possible explanation for the contradictory conclusions are that the 5 dpf

204 larvae did not develop shoaling behavior [20-22]. Therefore, we think  
205 that it is necessary to carry out controlled study which compares  
206 difference in color preference between individual and shoal adults.

207       So far, the color preference of individual fish has been studied by  
208 many groups, but no consensus is apparent with respect to this essential  
209 behavior in zebrafish. For example, Li *et al.* [38] found that zebrafish  
210 exhibited a robust preference for the green zone compared with the red  
211 zone. Soon after, an apparently contradictory result was reported by  
212 Pierog *et al.* [39], which demonstrated that zebrafish significantly  
213 preferred the red zone to the green zone. In addition, Kim *et al.* [40]  
214 claimed that there was no color preference between red and green. Since  
215 then, the color preference test has been replicated by different groups  
216 with their own experimental designs, it is difficult to control the  
217 experimental apparatus, the acclimation period and recording time. Park  
218 *et al.* [19] considered that vision of zebrafish can affect the color  
219 preference of fish by hypopigmentation of the retinal pigment epithelium.

220       Herein, for the first time, we identify the effect of social interaction  
221 that affects the color preference in shoal zebrafish. Our results  
222 demonstrated that individual zebrafish hardly had any clear preference for  
223 all the tested two-color combinations, while shoals of zebrafish exhibited  
224 a complex pattern of color preference and the order of RYGB preference  
225 was R>Y>G, B>G. We deduced that the color preference of zebrafish is

226 an innate attribute of shoals, and therefore individual fish lack of social  
227 interaction with one another showed no color preference. As a social  
228 animal, zebrafish prefers to spend most of time to social group and  
229 develops a complex behavioral pattern depending on timely social contact  
230 with its companions [41-43]. Additionally, zebrafish exhibited a strong  
231 preference for their own phenotype, and such preference were mediated  
232 by visual signals [44]. Instead, socially deprived zebrafish failed to show  
233 social preference and social interaction [44,45]. These results suggested  
234 that social interaction could be responsible for eliciting the preference for  
235 colors.

236 The dopaminergic system is involved in several brain functions  
237 which has been found to be associated with the shoaling tendencies [46].  
238 The dopamine plays key roles in the neurobehavioral functions in  
239 zebrafish [27,28]. For instance, the strong social stimuli will increase the  
240 dopamine and DOPAC levels in the brain of the adult zebrafish [27], and  
241 the short-term isolated zebrafish could reduce the level of DOPAC [28].  
242 Dopamine receptors distribute in different brain regions. Clearly, the  
243 specific areas are involved in cognition, including hippocampus, the  
244 prefrontal cortex, the amygdale, and the ventral and dorsal parts of the  
245 striatum. There are four different dopamine receptor subtypes (D1, D2,  
246 D3, and D4) in the brain of zebrafish [30,47,48]. Among the different  
247 types of dopaminergic receptors, the excitatory D1 receptor (D1-R)

248 subtype is the most predominately expressed in the brain regions [49].  
249 D1-R activate the production of intracellular 3'-5'-cyclic adenosine  
250 monophosphate (cAMP) through adenylyl cyclase induction and regulate  
251 intercellular calcium signaling or protein kinase activity [50].

252 The social interaction in shoals can be affected by the dopaminergic  
253 system through influence of the dopamine level [29]. To investigate the  
254 role of social interaction in the innate color preference in shoals, we  
255 employed a D1 dopamine receptor antagonist (SCH23390) and analyzed  
256 its effects on behavior of color preference. The drug was chosen because  
257 D1-R antagonist, SCH23390, is most abundantly expressed dopamine  
258 receptor subtypes in the brain of zebrafish [30]. Second, SCH23390  
259 disrupts social preference of zebrafish by decreasing the level of  
260 dopamine in dopaminergic system [31,32]. Finally, the drug is water  
261 soluble, and zebrafish can be administered by simple immersion in the  
262 drug solution.

263 The D1-R antagonist treatment which can disrupt the social  
264 interaction led to the deficits of color preference in shoals. The fish were  
265 employed by SCH23390 did not exhibit abnormal motor or posture and  
266 visual damage [29]. The article showed that SCH23390 decreased the  
267 preference of zebrafish to move toward and stay close to social stimuli  
268 [29]. Several potential mechanisms may be responsible for the decreased  
269 the level of dopamine through exposure to the D1 receptor antagonist

270 (SCH23390). The decreased of dopamine levels imply the reduced  
271 dopamine production and/or increased dopamine degradation in response  
272 to the employed SCH23390 [51]. Yung *et al.* [52] have shown that D1-R  
273 localized in the post-synaptic terminals of neurons in the basal ganglia.  
274 The blockade of post-synaptic neurotransmitter receptors may impair  
275 signaling downstream and reduce neurotransmitter release. The  
276 antagonist of D1 receptor could increase the concentration of dopamine  
277 in the synaptic cleft which lead to reuptake and leakage to extra-synaptic  
278 areas. The increased extra-synaptic dopamine could activate  
279 dopaminergic autoreceptors on the pre-synaptic neuron and inhibit the  
280 dopamine synthesis [53]. Taken together, these studies and our own  
281 suggest the role of social interaction in innate color preference of shoals,  
282 with color discrimination deficits linked to the decreased dopamine level  
283 in the brain of zebrafish.

284

### 285 **Acknowledgements**

286 We acknowledge the Funds for Huangshan Professorship of Hefei  
287 University of Technology (407-037019).

288 **References**

- 289 [1] P. Lucchetta, C. Bernstein, M. Théry, C. Lazzari, E. Desouhant,  
290 Foraging and associative learning of visual signals in a parasitic  
291 wasp, *Anim. Cogn.* 11 (2008) 525-533.
- 292 [2] J. Forrest, J.D. Tomson, Background complexity affects colour  
293 preference in bumblebees, *Naturwissenschaften* 96 (2009) 921-925.
- 294 [3] S. Lazopulo, A. Lazopulo, J.D. Baker, S. Syed, Daytime colour  
295 preference in *Drosophila* depends on the circadian clock and TRP  
296 channels, *Nature* 574 (2019) 108-111.
- 297 [4] Q. Duan, E. Goodale, R.C. Quan, Bird fruit preferences match the  
298 frequency of fruit colours in tropical Asia, *Sci. Rep.* 4 (2014) 5627.
- 299 [5] A. Avdesh, M.T. Martin-Iverson, A. Mondal, M. Chen, S. Askraba, N.  
300 Morgan, M. Lardelli, D.M. Groth, G. Verdile, R.N. Martins,  
301 Evaluation of color preference in zebrafish for learning and memory,  
302 *J. Alzheimer's Dis.* 28 (2012) 459-469.
- 303 [6] Z.A. Bault, S.M. Peterson, J.L. Freeman, Directional and color  
304 preference in adult zebrafish: Implications in behavioral and  
305 learning assays in neurotoxicity studies, *J. Appl. Toxicol.* 35 (2015)  
306 1502-1510.
- 307 [7] J. Oliveira, M. Silveira, D. Chacon, A. Luchiari, The zebrafish world  
308 of colors and shapes: Preference and discrimination, *Zebrafish* 12  
309 (2015) 166-173.
- 310 [8] S.E. Palmer, K.B. Schloss, J. Sammartino, Visual aesthetics and  
311 human preference, *Annu. Rev. Psychol.* 64 (2013) 77-107.
- 312 [9] J.A. Endler, Signals, signal conditions, and the direction of evolution,  
313 *Am. Nat.* 139 (1992) S125-S153.

- 314 [10] A. Kelber, D. Osorio, From spectral information to animal colour  
315 vision: Experiments and concepts, *Proc. R. Soc. B.* 277 (2010)  
316 1617-1625.
- 317 [11] P. Skorupski, L. Chittka, Is colour cognitive? *Optics Laser Tech.* 43  
318 (2011) 251-260.
- 319 [12] K. Lunau, S. Papiorek, T. Eltz, M. Sazima, Avoidance of achromatic  
320 colours by bees provides a private niche for hummingbirds, *J. Exp.*  
321 *Biol.* 214 (2011) 1607-1612.
- 322 [13] J.A. Endler, D.A. Westcott, J.R. Madden, T. Robson, Animal visual  
323 systems and the evolution of color patterns: sensory processing  
324 illuminates signal evolution, *Evolution.* 59 (2005) 1795-1818.
- 325 [14] M.J. Hamblen-Coyle, D.A. Wheeler, J.E. Rutila, M. Rosbash, J.C.  
326 Hall, Behavior of period-altered rhythm mutants of *Drosophila* in  
327 light: dark cycles, *J. Insect Behav.* 5 (1992) 417-446.
- 328 [15] V.C. Fleisch, S.C. Neuhauss, Visual behavior in zebrafish, *Zebrafish*  
329 3 (2006) 191-201.
- 330 [16] X. Li, B. Liu, X.L. Li, Y.X. Li, M.Z. Sun, D.Y. Chen, X. Zhao, X.Z.  
331 Feng, SiO<sub>2</sub> nanoparticles change colour preference and cause  
332 Parkinson's-like behaviour in zebrafish, *Sci. Rep.* 4 (2013) 1-9.
- 333 [17] R.M. Colwill, M.P. Raymond, L. Ferreira, H. Escudero, Visual  
334 discrimination learning in zebrafish (*Danio rerio*), *Behav. Process.* 70  
335 (2005) 19-31.
- 336 [18] N. Miller, R. Gerlai, Quantification of shoaling behaviour in  
337 zebrafish (*Danio rerio*), *Behav. Brain Res.* 184 (2007) 157-166.
- 338 [19] J.S. Park, J.H. Ryu, T.I. Choi, Y.K. Bae, S. Lee, H.J. Kang, C.H.  
339 Kim, Innate color preference of zebrafish and its use in behavioral  
340 analyse, *Mol. Cells* 39 (2016) 750-755.



- 341 [20] C. Buske, R. Gerlai, Shoaling develops with age in Zebrafish (*Danio*  
342 *rerio*), *Prog. Neuro-Psychopharmacol. Biol. Psychiatry* 35 (2011)  
343 1409-1415.
- 344 [21] E. Dreosti, G. Lopes, A.R. Kampff, S.W. Wilson, Development of  
345 social behavior in young zebrafish, *Front. Neural Circuits* 9 (2015)  
346 39.
- 347 [22] R.C. Hinz, G.G. de Polavieja, Ontogeny of collective behavior  
348 reveals a simple attraction rule, *Proc. Natl. Acad. Sci. U. S. A.* 114  
349 (2017) 2295-2300.
- 350 [23] C. Buske, R. Gerlai, Maturation of shoaling behavior is accompanied  
351 by changes in the dopaminergic and serotonergic systems in  
352 zebrafish, *Dev. Psychobiol.* 54 (2012) 28-35.
- 353 [24] P.M. Ma, M. Lopez, Consistency in the number of dopaminergic  
354 paraventricular organ-accompanying neurons in the posterior  
355 tuberculum of the zebrafish brain, *Brain Res.* 967 (2003) 267-272.
- 356 [25] J.A. Girault, P. Greengard, The neurobiology of dopamine signaling,  
357 *Arch. Neurol.* 61 (2004) 641-644.
- 358 [26] A. Vidal-Gadea, S. Topper, L. Young, A. Crisp, L. Kressin, E. Elbel,  
359 T. Maples, M. Brauner, K. Erbguth, A. Axelrod, A. Gottschalk, D.  
360 Siegel, J.T. Pierce-Shimomura, *Caenorhabditis elegans* selects  
361 distinct crawling and swimming gaits via dopamine and serotonin,  
362 *Proc. Natl. Acad. Sci. U. S. A.* 108 (2011) 17504-17509.
- 363 [27] M. Saif, D. Chatterjee, C. Buske, R. Gerlai, Sight of conspecific  
364 images induces changes in neurochemistry in zebrafish, *Behav.*  
365 *Brain Res.* 243 (2013) 294-299.
- 366 [28] S. Shams, S. Amlani, C. Buske, D. Chatterjee, R. Gerlai,  
367 Developmental social isolation affects adult behavior, social

- 368 interaction, and dopamine metabolite levels in zebrafish, *Dev.*  
369 *Psychobiol.* 60 (2018) 43-56.
- 370 [29] T. Scerbina, D. Chatterjee, R. Gerlai, Dopamine receptor antagonism  
371 disrupts social preference in zebrafish: A strain comparison study,  
372 *Amino. Acids.* 43 (2012) 2059-2072.
- 373 [30] P. Li, S. Shah, L. Huang, A.L. Carr, Y. Gao, C. Thisse, B. Thisse, L.  
374 Li, Cloning and spatial and temporal expression of the zebrafish  
375 dopamine D1 receptor, *Dev. Dyn.* 236 (2007) 1339-1346.
- 376 [31] J.D. Steketee, Injection of SCH 23390 into the ventral tegmental  
377 area blocks the development of neurochemical but not behavioral  
378 sensitization to cocaine, *Behav. Pharmacol.* 9 (1998) 69-76.
- 379 [32] K. Kurata, R. Shibata, Effects of D1 and D2 antagonists on the  
380 transient increase of dopamine release by dopamine agonists by  
381 means of brain dialysis, *Neurosci. Lett.* 133 (1991) 77-80.
- 382 [33] J. Wang, C.H. Liu, F. Ma, W. Chen, J. Liu, B. Hu, L. Zheng,  
383 Circadian clock mediates light/dark preference in zebrafish (*Danio*  
384 *Rerio*), *Zebrafish* 11 (2014) 115-121.
- 385 [34] R. E. Engeszer, L.B. Patterson, A.A. Rao, D.M. Parichy, Zebrafish  
386 in the wild: a review of natural history and new notes from the field,  
387 *Zebrafish* 4 (2007) 21-40.
- 388 [35] R. Gerlai, Social behavior of zebrafish: From synthetic images to  
389 biological mechanisms of shoaling, *J. Neurosci. Methods* 234 (2014)  
390 59-65.
- 391 [36] R. Spence, M.K. Fatema, S. Ellis, Z.F. Ahmed, C. Smith, Diet,  
392 growth and recruitment of wild zebrafish in Bangladesh, *J. Fish Biol.*  
393 71 (2007) 304-309.

- 394 [37] B.W.M.M. Peeters, M. Moeskops, A.R.J. Veenvliet, Color  
395 preference in *Danio rerio*: effects of age and anxiolytic treatments,  
396 *Zebrafish* 13 (2016) 330-334.
- 397 [38] X. Li, M.Z. Sun, X. Li, S.H. Zhang, L.T. Dai, X.Y. Liu, X. Zhao,  
398 D.Y. Chen, X.Z. Feng, Impact of low-dose chronic exposure to  
399 Bisphenol A (BPA) on adult male zebrafish adaption to the  
400 environmental complexity: Disturbing the color preference patterns  
401 and reliving the anxiety behavior, *Chemosphere* 186 (2017)  
402 295-304.
- 403 [39] M. Pieróg, L. Guz, U. Doboszevska, E. Poleszak, P. Wlaź, Effect of  
404 alprazolam treatment on anxiety-like behavior induced by color  
405 stimulation in adult zebrafish, *Prog. Neuropsychopharmacol. Biol.*  
406 *Psychiatry*. 82 (2018) 297-306.
- 407 [40] Y.H. Kim, K.S. Lee, A.R. Park, T.J. Min, Adding preferred color to  
408 a conventional reward method improves the memory of zebrafish in  
409 the T-maze behavior model, *Anim. cells and syst.* 21 (2017)  
410 374-381.
- 411 [41] N. Ruhl, S.P. McRobert, The effect of sex and shoal size on shoaling  
412 behaviour in *Danio rerio*, *J Fish Biol.* 67 (2005) 1318-1326.
- 413 [42] A. Etinger, J. Lebron, B.G. Palestis, Sex-assortative shoaling in  
414 zebrafish (*Danio rerio*), *Bios.* 80 (2009) 153-158.
- 415 [43] J.L. Snekser, N. Ruhl, K. Bauer, S.P. McRobert, The influence of  
416 sex and phenotype on shoaling decisions in zebrafish, *Intern. J.*  
417 *Comp. Psychol.* 23 (2010) 70-81.
- 418 [44] R.E. Engeszer, M.J. Ryan, D.M. Parichy, Learned social preference  
419 in zebrafish, *Curr. Boil.* 14 (2004) 881-884.

- 420 [45] G. Gerlach, A. Hodgins-Davis, C. Avolio, C. Schunter, Kin  
421 recognition in zebrafish: A 24-hour window for olfactory imprinting,  
422 Proc. Biol. Sci. 275 (2008) 2165-2170.
- 423 [46] P.S. Suriyampola, D.S. Shelton, R. Shukla, T. Roy, A. Bhat, E.P.  
424 Martins, Zebrafish social behavior in the wild, Zebrafish 13 (2016)  
425 1-8.
- 426 [47] W. Boehmler, S. Obrecht-Pflumio, V. Canfield, C. Thisse, B. Thisse,  
427 R. Levenson, Evolution and expression of D2 and D3 dopamine  
428 receptor genes in zebrafish, Dev. Dyn. 230 (2004) 481-493.
- 429 [48] W. Boehmler, T. Carr, C. Thisse, B. Thisse, V.A. Canfield, R.  
430 Levenson, D4 Dopamine receptor genes of zebrafish and effects of  
431 the antipsychotic clozapine on larval swimming behavior, Genes  
432 Brain Behav. 6 (2007) 155-166.
- 433 [49] R.T. Fremeau, G.E. Jr, Duncan, M.G. Fornaretto, A. Dearry, J.A.  
434 Gingrich, G.R. Breese, M.G. Caron, Localization of D1 dopamine  
435 receptor mRNA in brain supports a role in cognitive, affective, and  
436 neuroendocrine aspects of dopaminergic neurotransmission, Proc.  
437 Natl. Acad. Sci. U. S. A. 88 (1991) 3772-3776.
- 438 [50] M. Naderi, A. Jamwal, D. P.Chivers, S. Niyogi, Modulatory effects  
439 of dopamine receptors on associative learning performance in  
440 zebrafish (*Danio rerio*), Behav. Brain Res. 303 (2016) 109-119.
- 441 [51] L. Diop, E. Gottberg, R. Brière, L. Grondin, T.A. Reader,  
442 Distribution of dopamine D1 receptors in rat cortical areas,  
443 neostriatum, olfactory bulb and hippocampus in relation to  
444 endogenous dopamine contents, Synapse 2 (1988)395-405.
- 445 [52] K.K.L. Yung, J.P. Bolam, A.D. Smith, S.M. Hersch, B.J. Ciliax, A.I.  
446 Levey, Immunocytochemical localization of D1 and D2 dopamine  
447 receptors in the basal ganglia of the rat: Light and electron  
448 microscopy, Neurosci. 65 (1995) 709-730.

449 [53] A.H. Tissari, M.S. Lillgäls, Reduction of dopamine synthesis  
450 inhibition by dopamine autoreceptor activation in striatal  
451 synaptosomes with in vivo reserpine administration, *J. Neurochem.*  
452 61 (1993) 231-238.

453

454 **Graphical abstract**

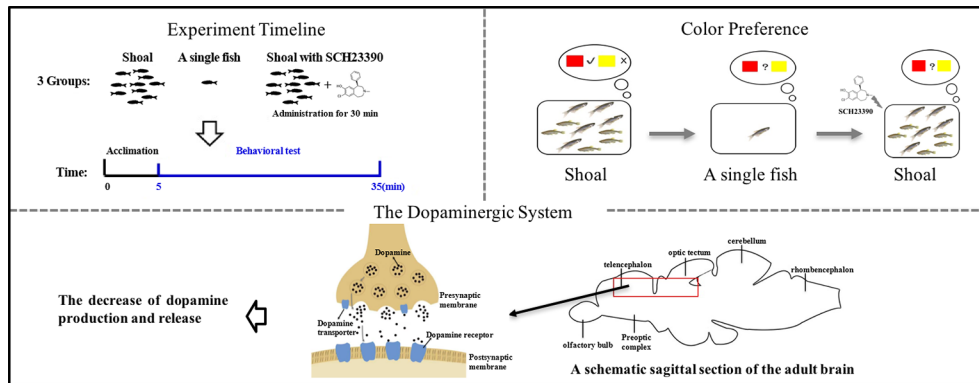

455

456

457 **Figure Captions**

458 **Fig. 1.** The shoals of zebrafish exhibit the innate color preference with 4  
459 color combinations (R-Y, R-G, Y-G, B-G). R, red; Y, yellow; G, green; B,  
460 blue. The percentage of numbers of 10-adult zebrafish spent in each  
461 colored zone was counted every 1 min for a total of 30 min (n=10). \*\*  
462  $p<0.01$ , \*\*\*  $p<0.001$ .

463

464 **Fig. 2.** The color preference of an individual fish according to 4 color  
465 combinations (R-Y, R-G, Y-G, B-G). The percentage of time of fish spent  
466 in each colored zone was recorded during 30-min experiment (n=15).

467

468 **Fig. 3.** The color preference of shoals with SCH23390 treatment in 4  
469 color combinations (R-Y, R-G, Y-G, B-G). The percentage of numbers of  
470 10-adult zebrafish spent in each colored zone was counted every 1 min  
471 for a total of 30 min (n=10).

472

473 Fig.1

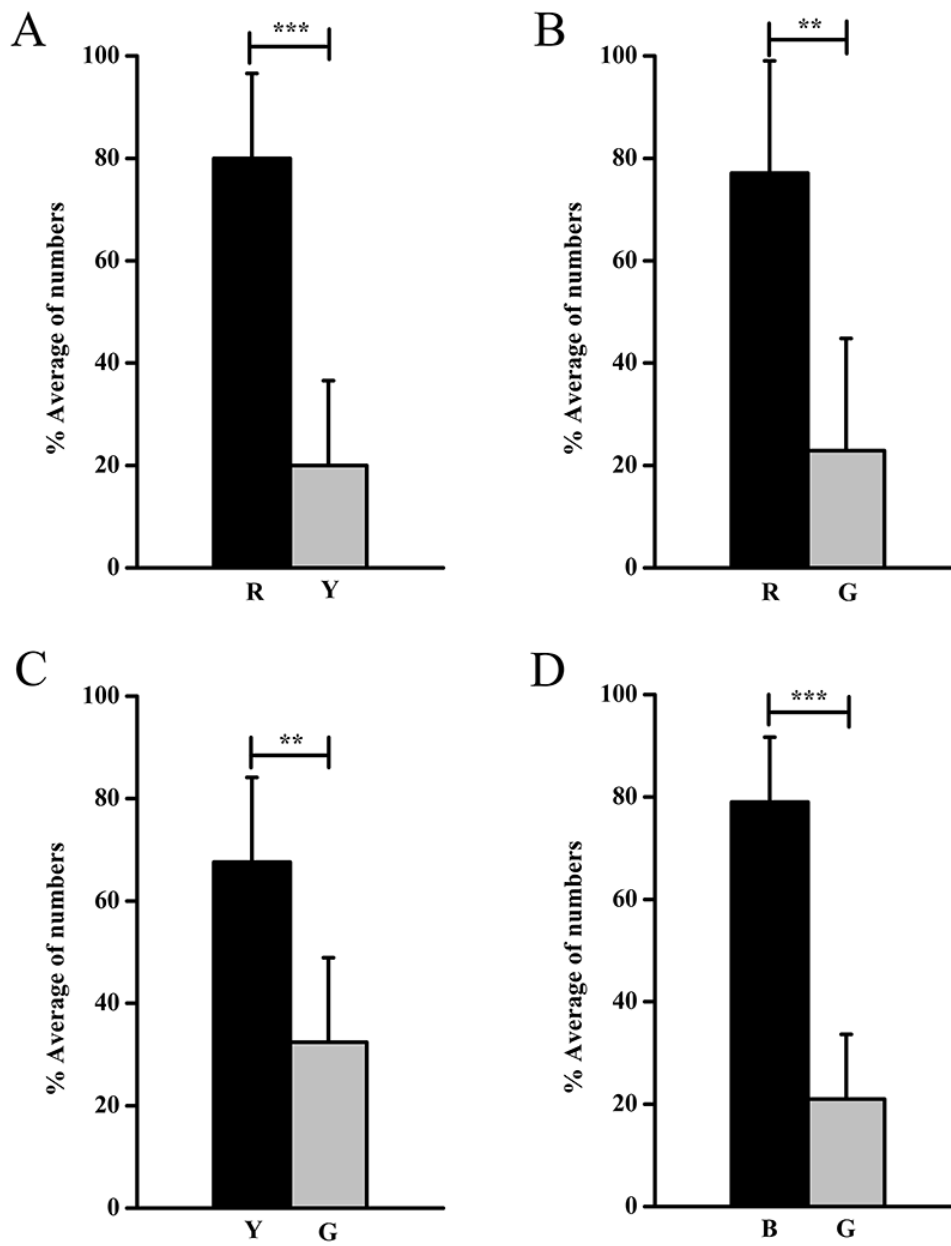

474

475



476 Fig. 2

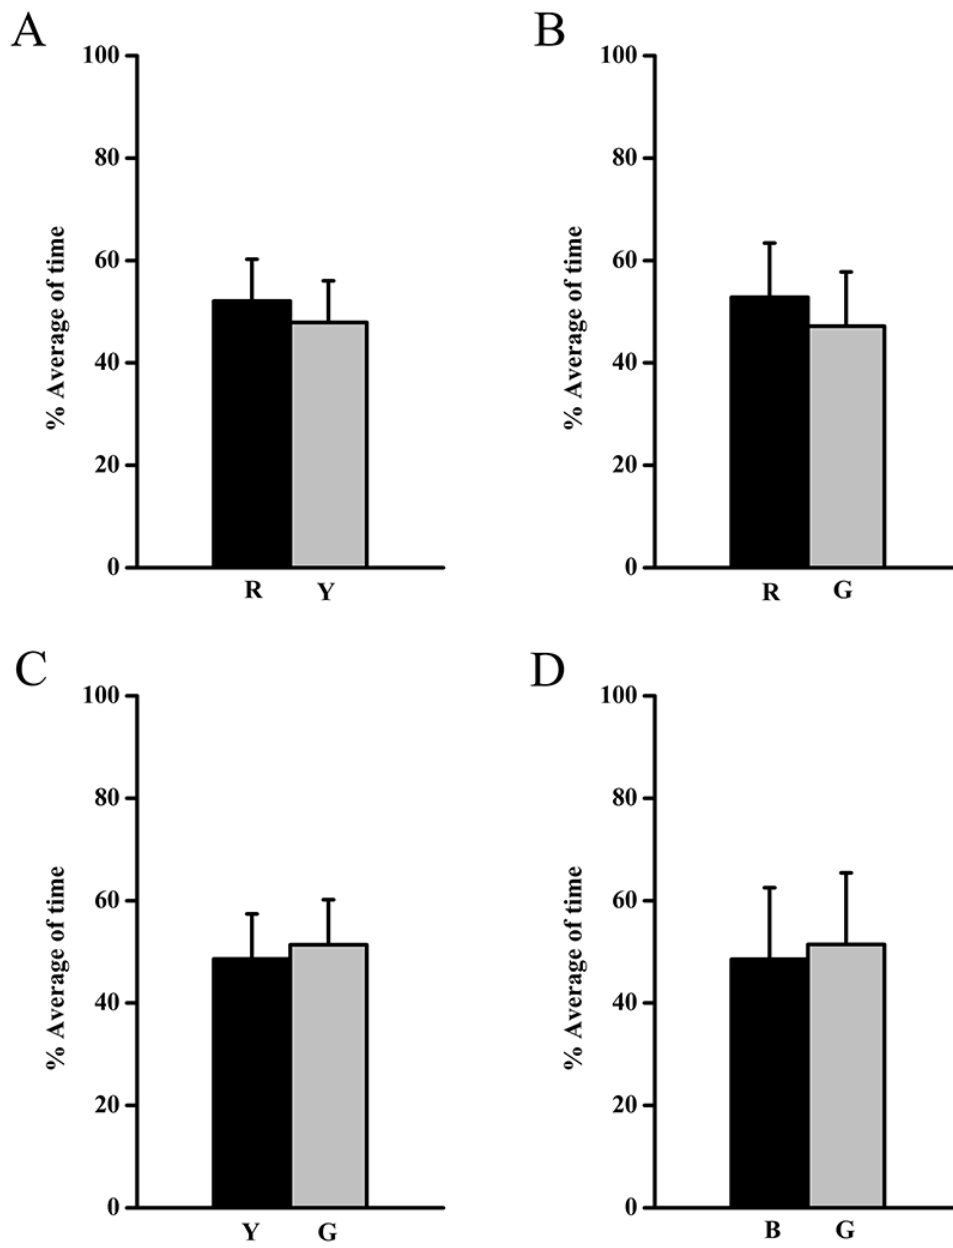

477

478

479 Fig. 3

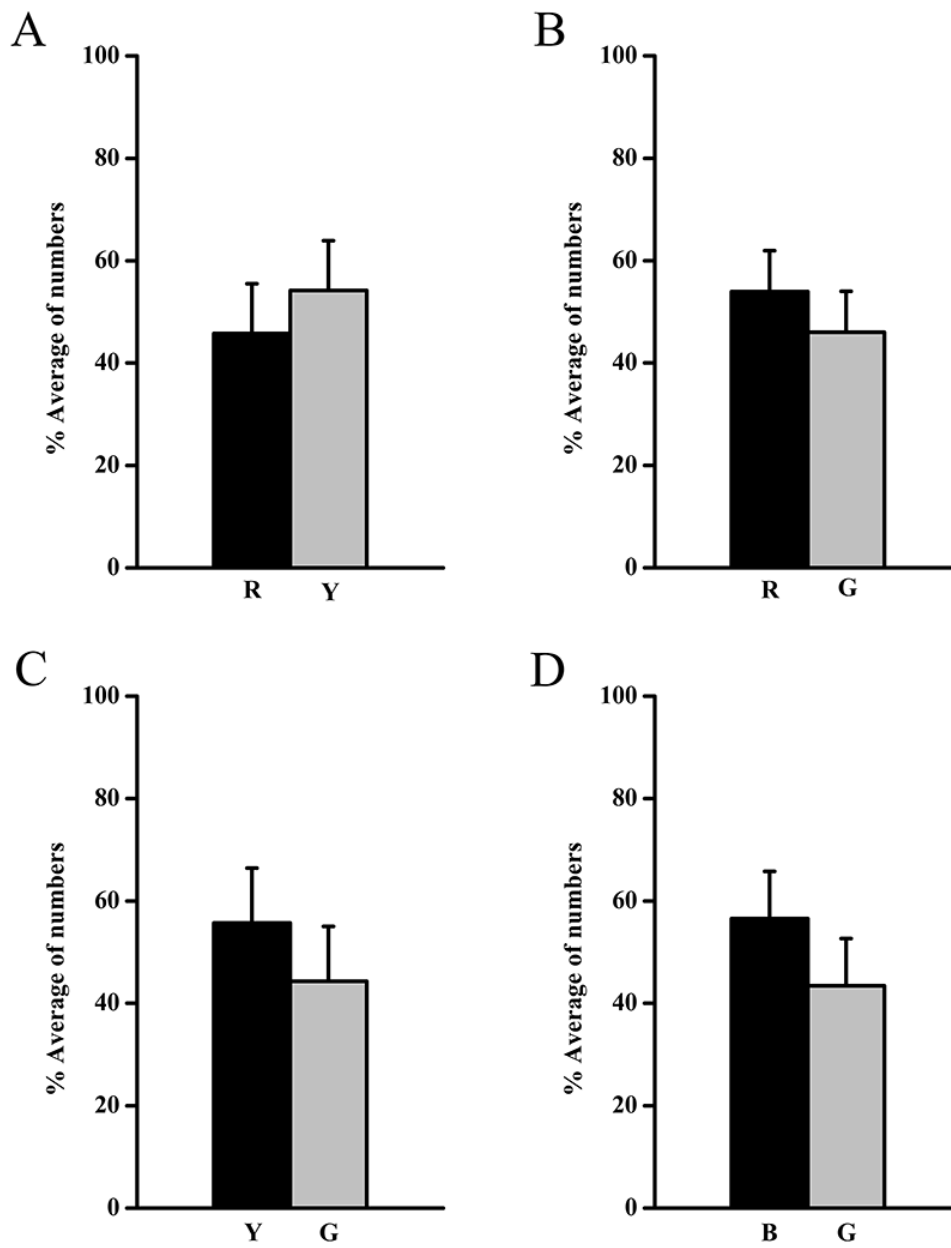

480

481

482 **Supplemental Information**

483 **Social interaction influences innate color preference**  
484 **of zebrafish shoals**

485 Ju Wang <sup>a</sup>, Lifen Yin <sup>a</sup>, Bin Hu <sup>b</sup>, Lei Zheng <sup>a,\*</sup>

486 a School of Food and Biological Engineering, Hefei University of  
487 Technology, Hefei, 230009, China

488 b School of Life Science, University of Science and Technology of China,  
489 Hefei, 230027, China

490

491

492 **Figure Captions**

493 **Fig. S1.** The color preference of shoals in B-Y and B-R. R, red; Y, yellow;  
494 B, blue. The percentage of numbers of 10-adult zebrafish spent in each  
495 colored zone was counted every 1 min for a total of 30 min (n=10).

496

497 **Fig. S2.** The color preference of an individual fish in B-Y and B-R. The  
498 percentage of time of fish spent in each colored zone was recorded during  
499 30-min experiment (n=15).

500

501 Fig. S1

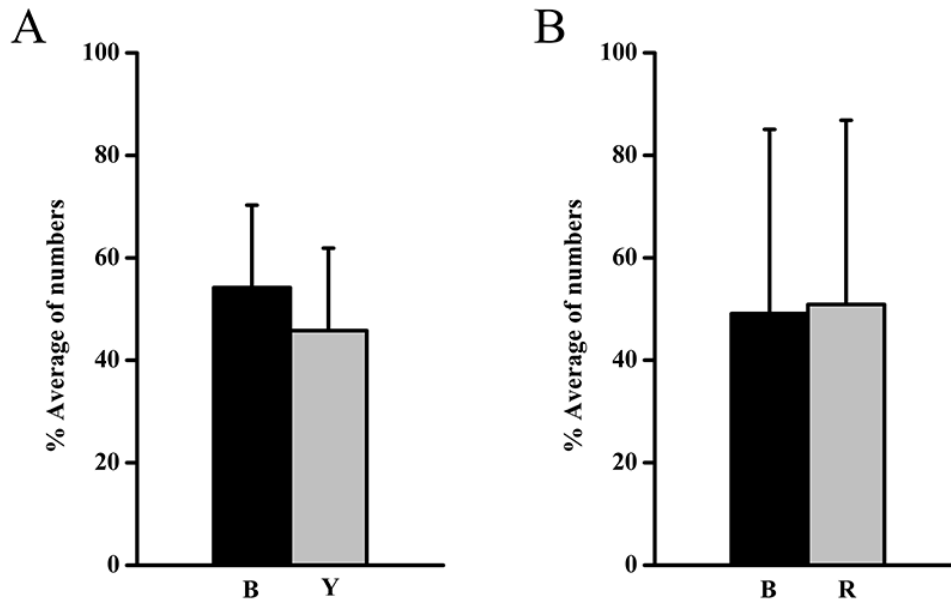

502

503

504 Fig. S2

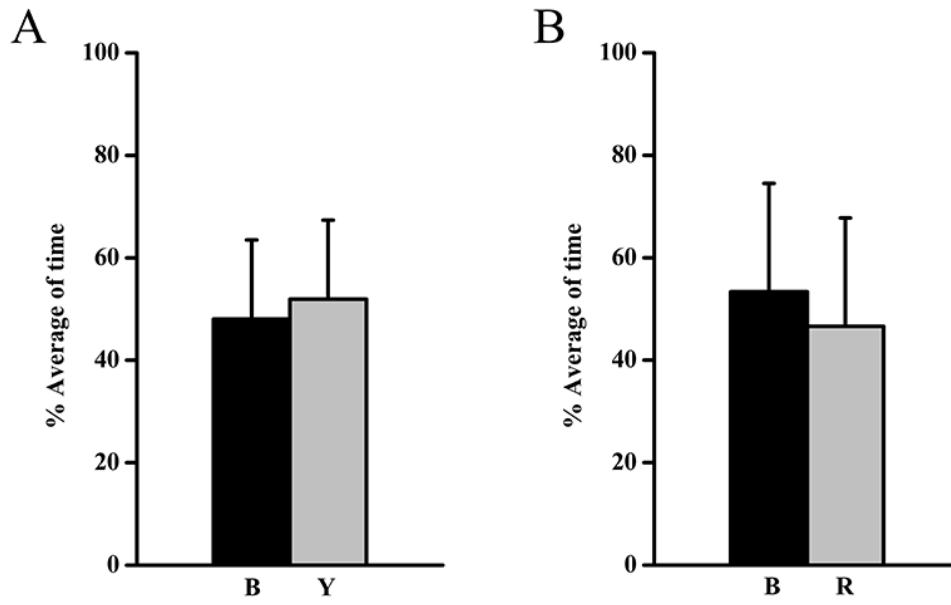

505

506

507 **Table Captions**

508 **Table S1.** The results of color preference in zebrafish with different

509 treatments.

510

511 Table S1. The results of color preference in zebrafish with different treatments

| Treatment                                              | Color  | % Average of time (or % Average of number) | t-value, p-value           |
|--------------------------------------------------------|--------|--------------------------------------------|----------------------------|
| The color preference of shoals                         | R vs Y | 80.00±16.56 vs 20.00±16.56                 | $t_9=5.73$ , $p<0.001$ *** |
|                                                        | R vs G | 77.10±21.92 vs 22.90±21.92                 | $t_9=3.91$ , $p<0.01$ **   |
|                                                        | Y vs G | 67.27±16.52 vs 32.73±16.52                 | $t_9=3.31$ , $p<0.01$ **   |
|                                                        | B vs G | 79.01±12.65 vs 20.99±12.65                 | $t_9=7.25$ , $p<0.001$ *** |
|                                                        | B vs Y | 54.20±16.10 vs 45.80±16.10                 | $t_9=0.83$ , $p=0.431$     |
|                                                        | B vs R | 49.10±35.94 vs 50.90±35.94                 | $t_9=0.08$ , $p=0.939$     |
| The color preference of the single zebrafish           | R vs Y | 52.10±8.14 vs 47.90±8.14                   | $t_{14}=1.45$ , $p=0.170$  |
|                                                        | R vs G | 52.82±10.59 vs 47.18±10.59                 | $t_{14}=1.50$ , $p=0.156$  |
|                                                        | Y vs G | 48.61±8.80 vs 51.39±8.80                   | $t_{14}=0.88$ , $p=0.393$  |
|                                                        | B vs G | 48.56±13.98 vs 51.44±13.98                 | $t_{14}=0.57$ , $p=0.578$  |
|                                                        | B vs Y | 48.07±15.42 vs 51.93±15.42                 | $t_{14}=0.70$ , $p=0.498$  |
|                                                        | B vs R | 53.38±21.15 vs 46.62±21.15                 | $t_{14}=0.89$ , $p=0.389$  |
| The color preference of shoals with SCH23390 treatment | R vs Y | 45.80±9.70 vs 54.20±9.70                   | $t_9=1.37$ , $p=0.204$     |
|                                                        | R vs G | 53.97±7.99 vs 46.03±7.99                   | $t_9=1.57$ , $p=0.151$     |
|                                                        | Y vs G | 55.70±10.72 vs 44.30±10.72                 | $t_9=1.68$ , $p=0.127$     |
|                                                        | B vs G | 56.57±9.20 vs 43.43±9.20                   | $t_9=2.26$ , $p=0.050$     |

512

513

514
